# Supplementary material
Source: ML conference proceedings conference paper supplement (https://aclanthology.org/2025.woah-1.12)

Initial starting point

Classifier development

Analysis

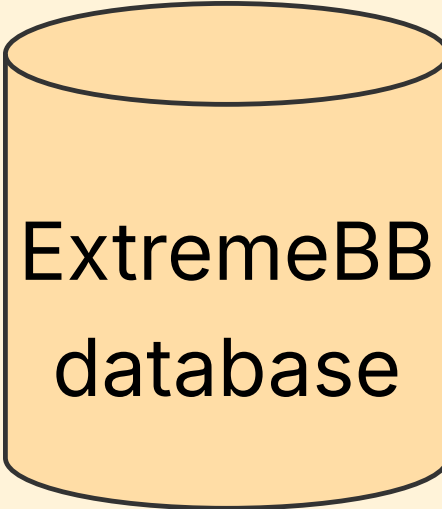

Filter data  
from  
chosen  
forum

Annotate a  
random sample  
of forum posts

Develop 4  
classifiers  
based on  
annotated data

Evaluation of  
classifiers

Run all  
classifiers on  
all posts in the  
forum

Perform  
statistical  
analysis on  
findings

Collection of additional data

Filter archive  
links and scrape  
them for original  
domain

Filter links to  
Twitter/X

Scrape content  
from both  
original link and  
archive link

Analyse  
differences  
between the  
archived and  
current version

Perform  
Topic  
Analysis

Has  
the post been  
deleted?

No

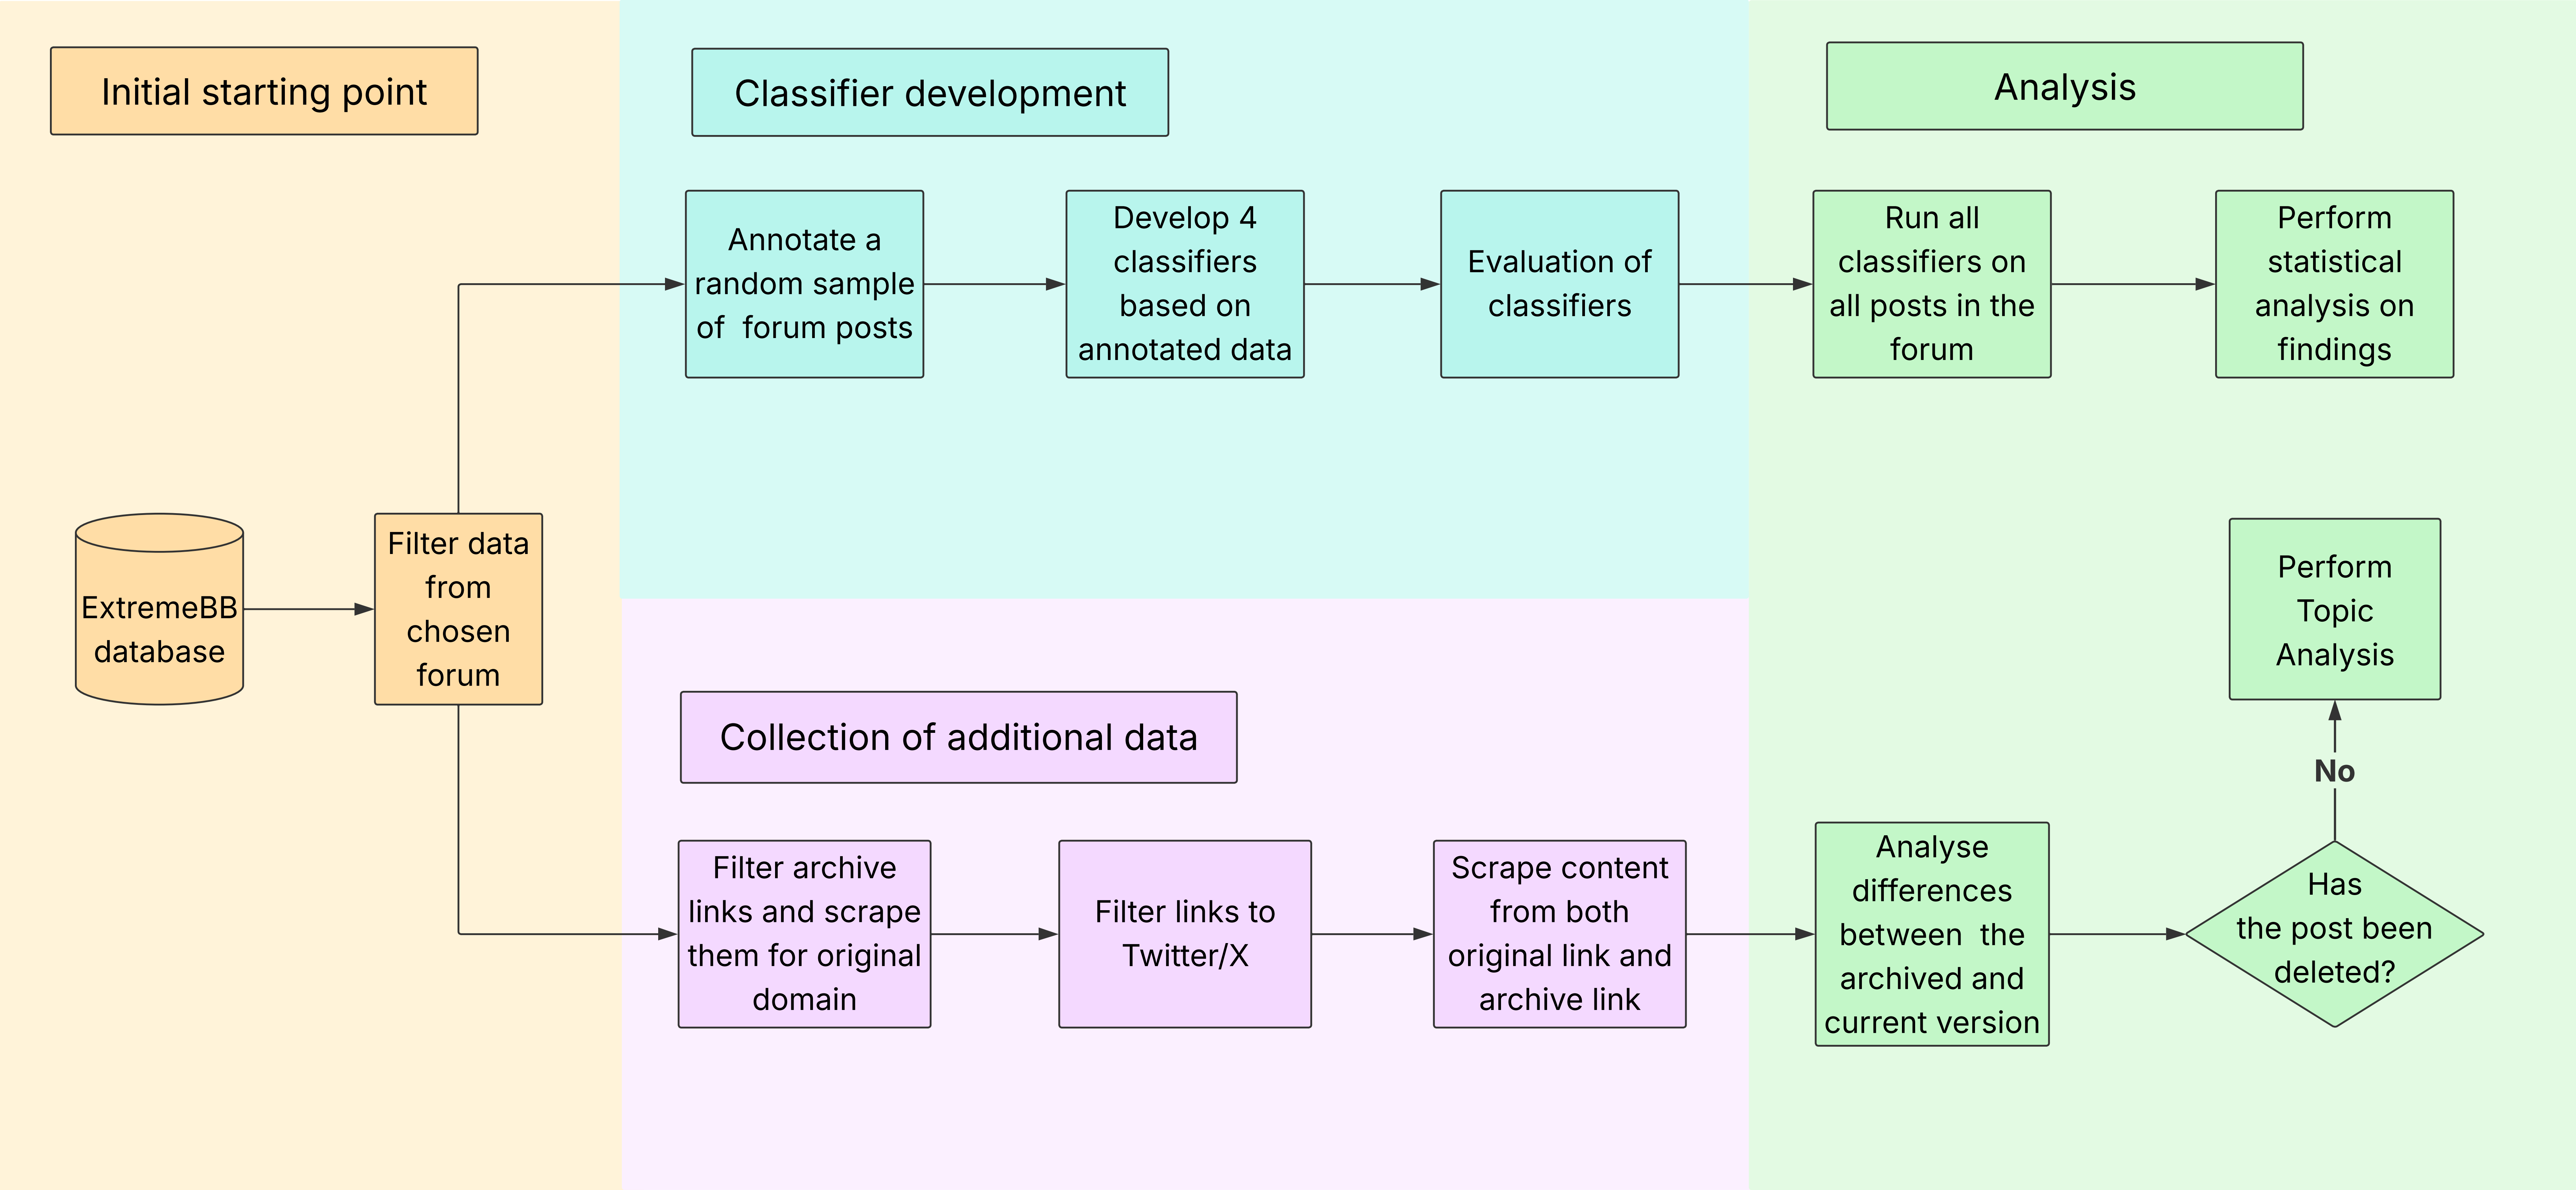

Supplement: SupplementaryMaterial [file 2025.woah-1.12.SupplementaryMaterial.zip]
