# Supplementary material
Source: ML conference proceedings conference paper supplement (https://aclanthology.org/2025.woah-1.12)

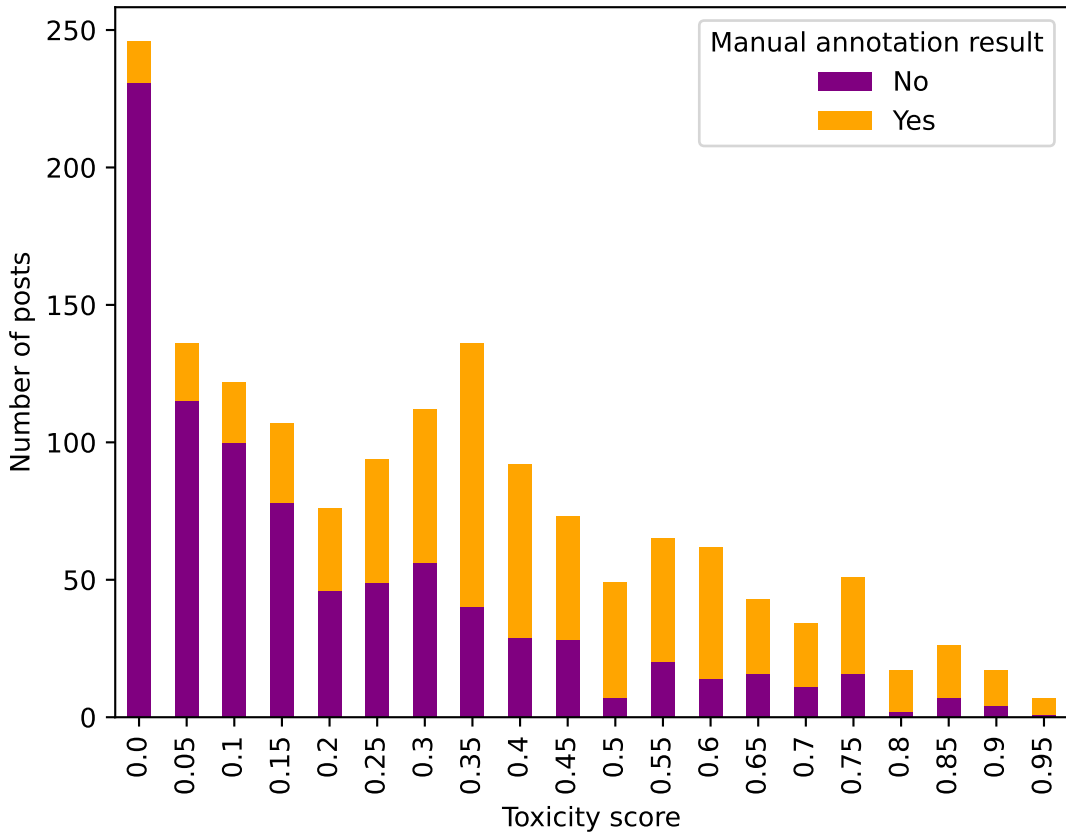

Supplement: SupplementaryMaterial [file 2025.woah-1.12.SupplementaryMaterial.zip]

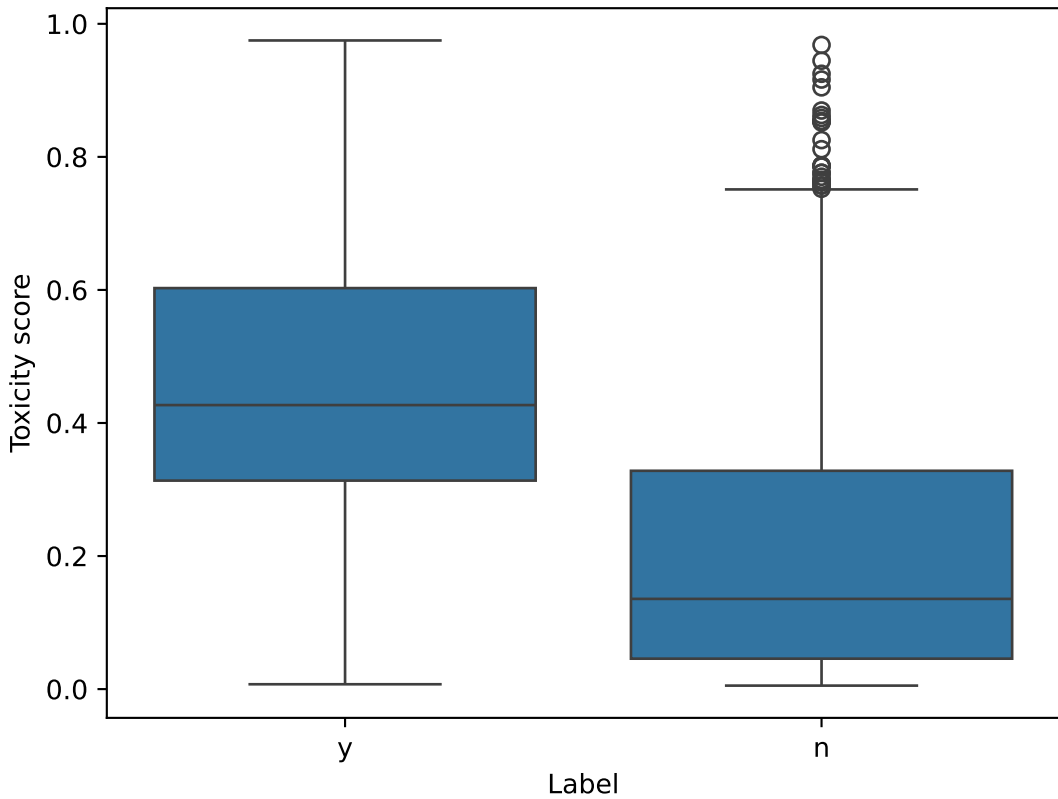

Supplement: SupplementaryMaterial [file 2025.woah-1.12.SupplementaryMaterial.zip]

# Frequency of archive links posted

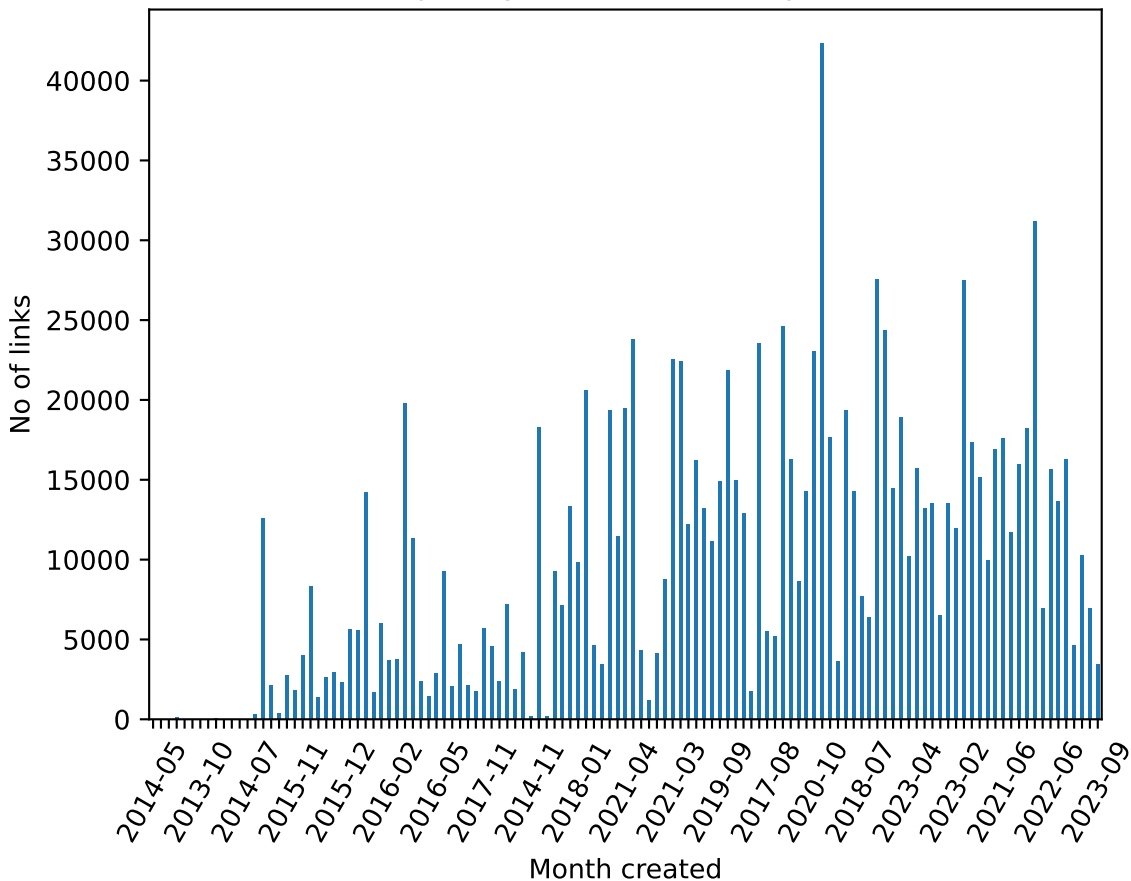

Supplement: SupplementaryMaterial [file 2025.woah-1.12.SupplementaryMaterial.zip]

Frequency of archived twitter links

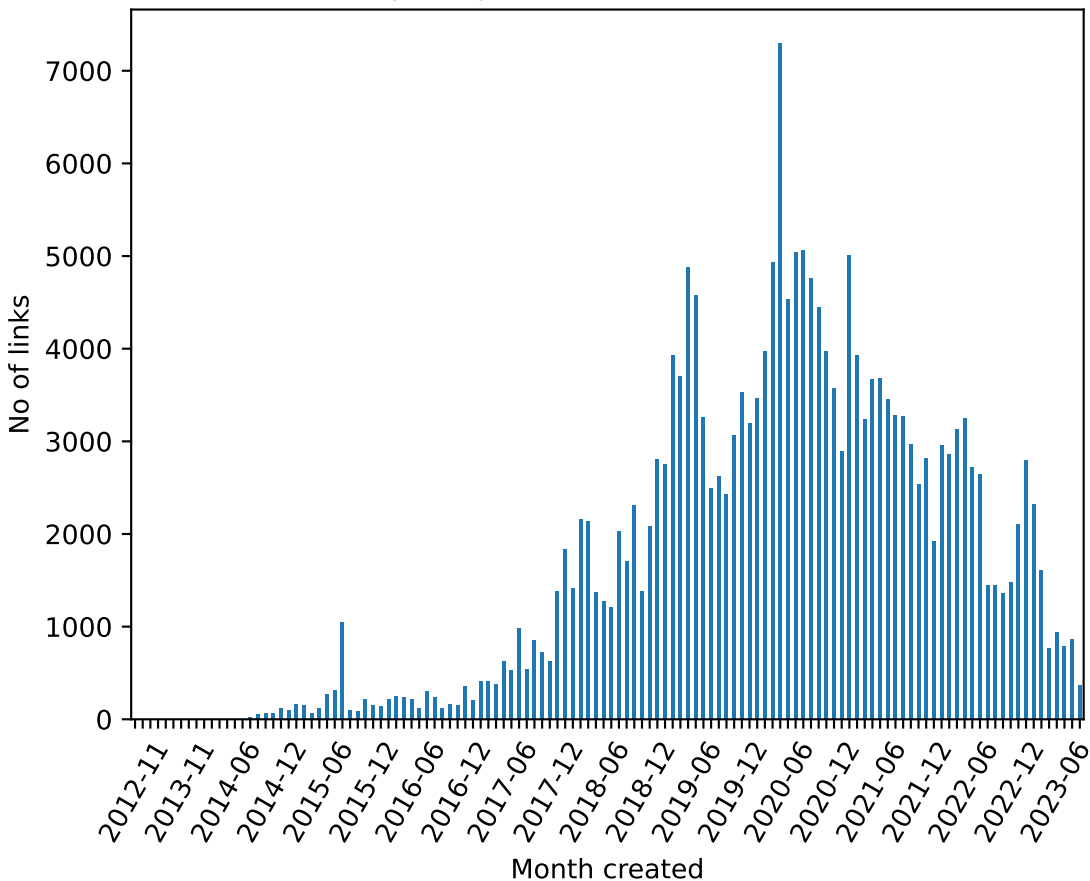

Supplement: SupplementaryMaterial [file 2025.woah-1.12.SupplementaryMaterial.zip]

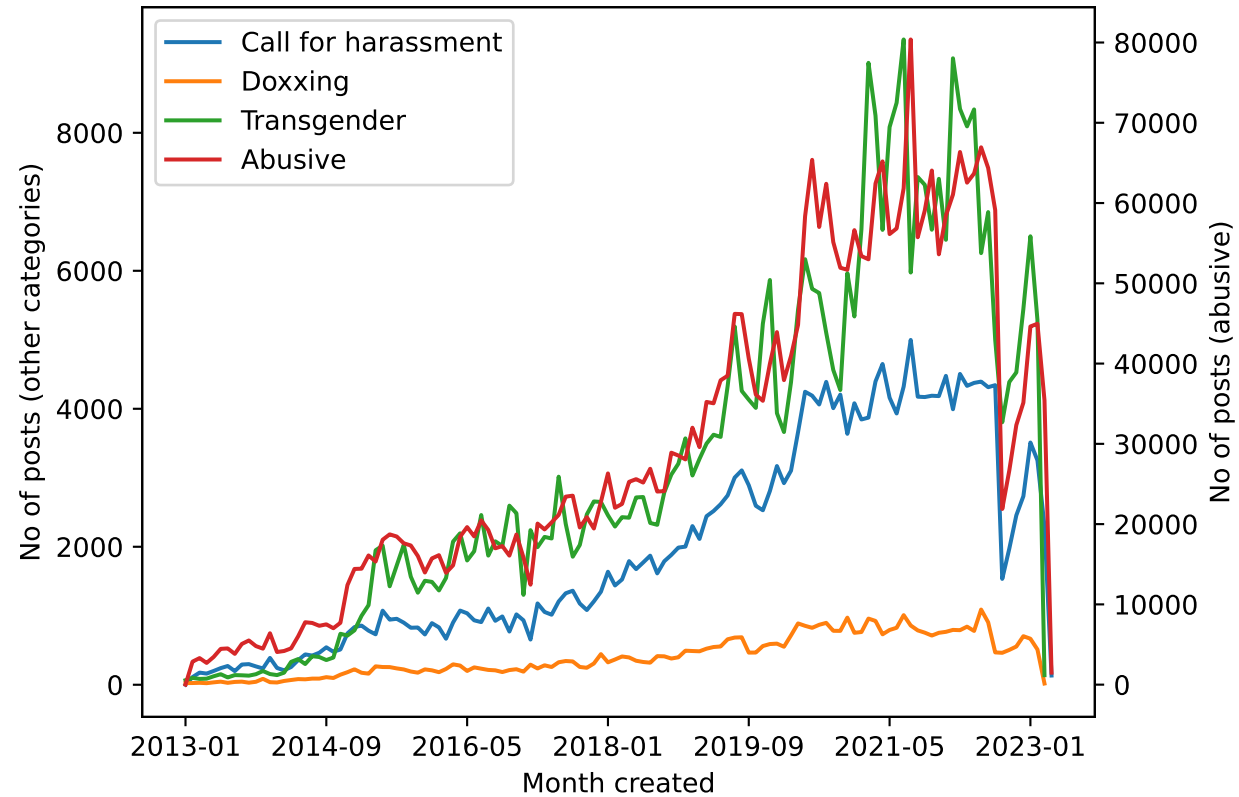

Supplement: SupplementaryMaterial [file 2025.woah-1.12.SupplementaryMaterial.zip]

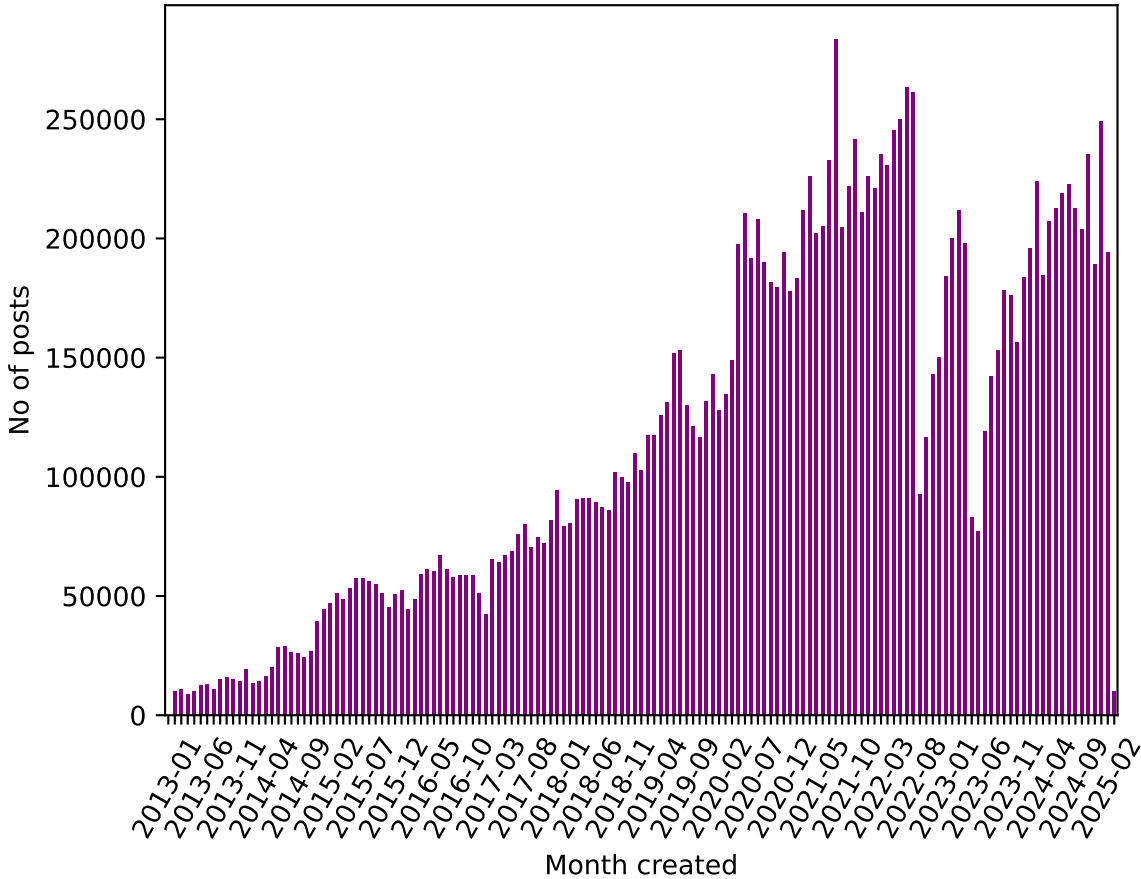

Supplement: SupplementaryMaterial [file 2025.woah-1.12.SupplementaryMaterial.zip]

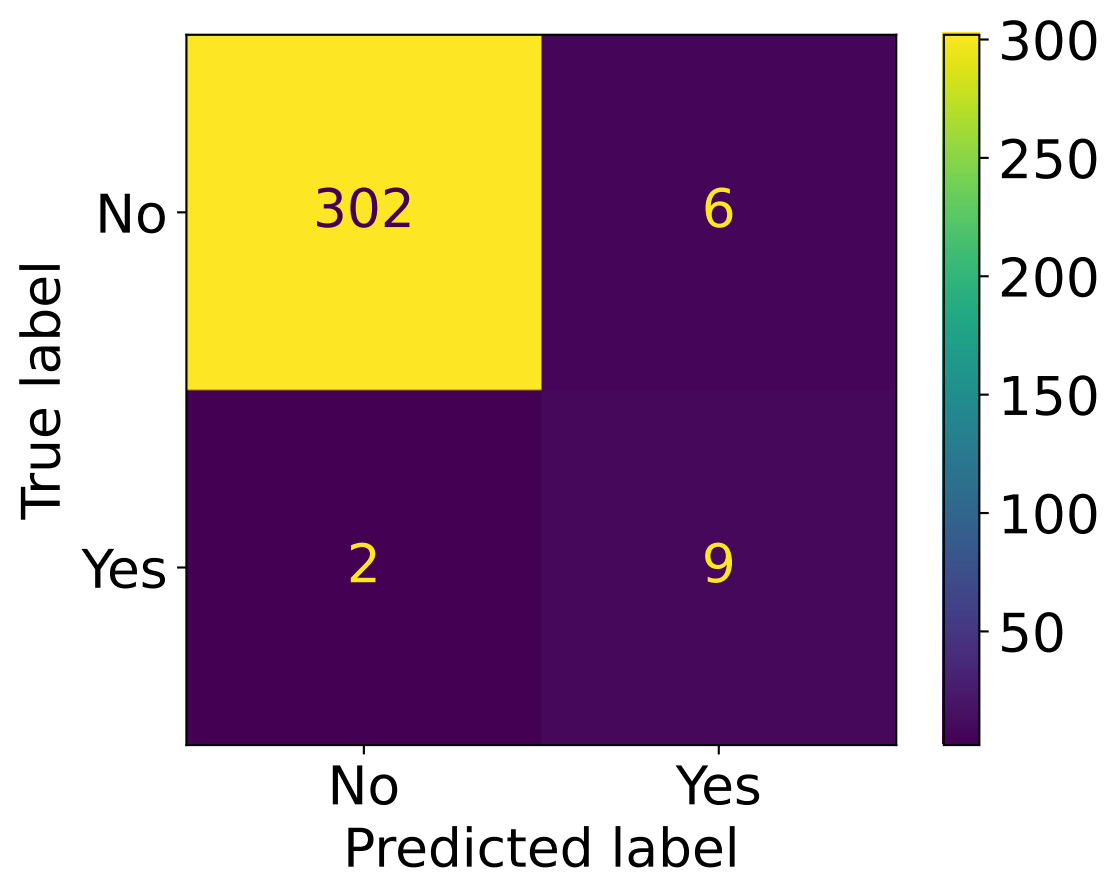

Supplement: SupplementaryMaterial [file 2025.woah-1.12.SupplementaryMaterial.zip]

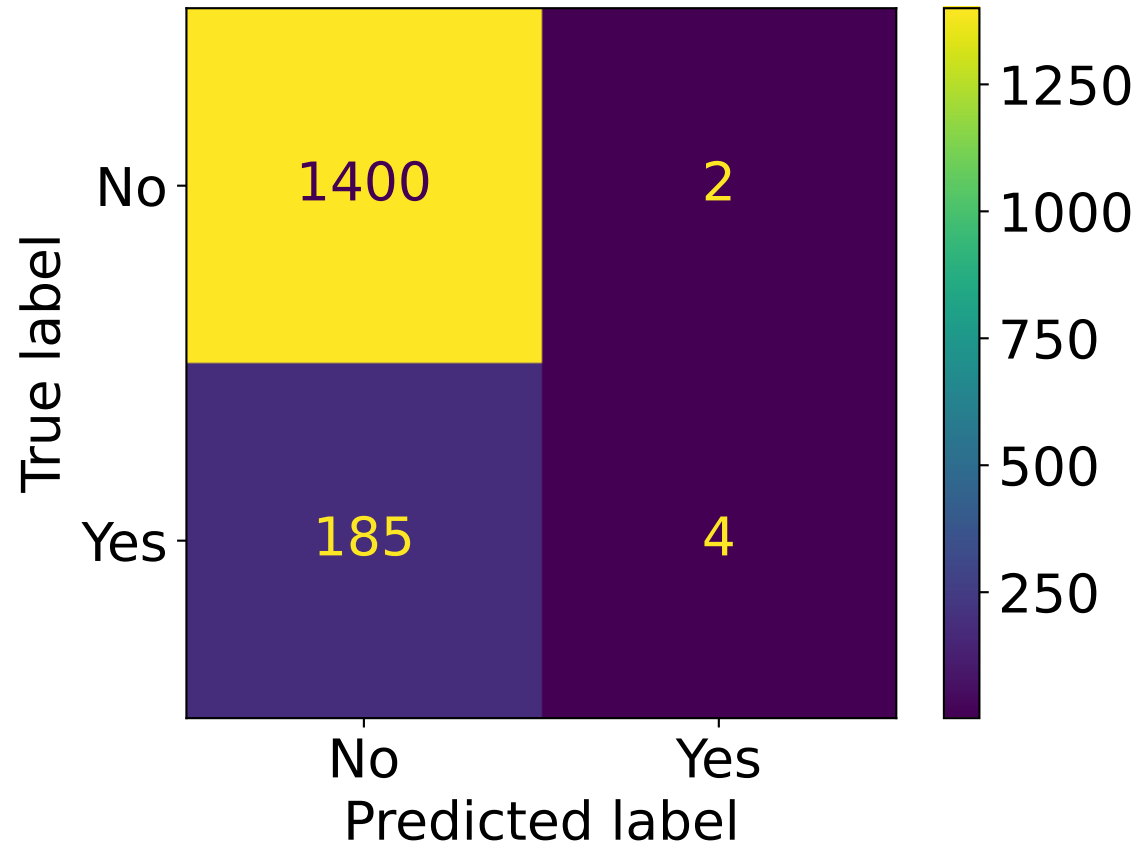

Supplement: SupplementaryMaterial [file 2025.woah-1.12.SupplementaryMaterial.zip]

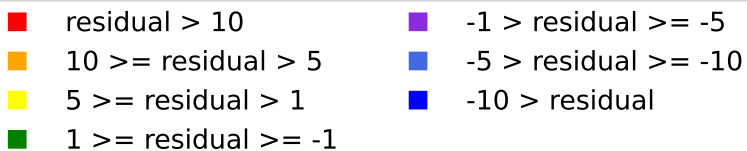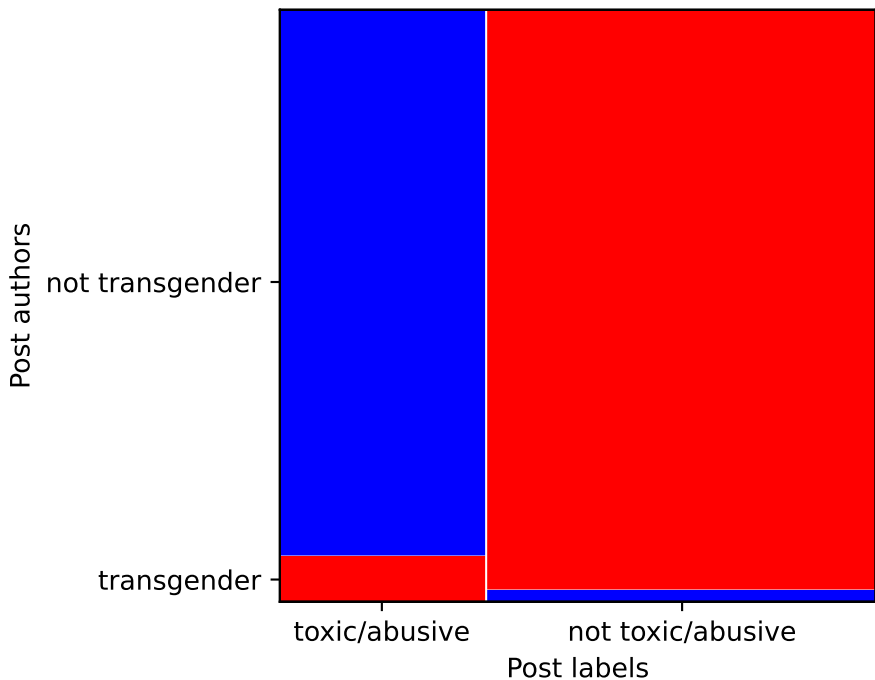

Supplement: SupplementaryMaterial [file 2025.woah-1.12.SupplementaryMaterial.zip]

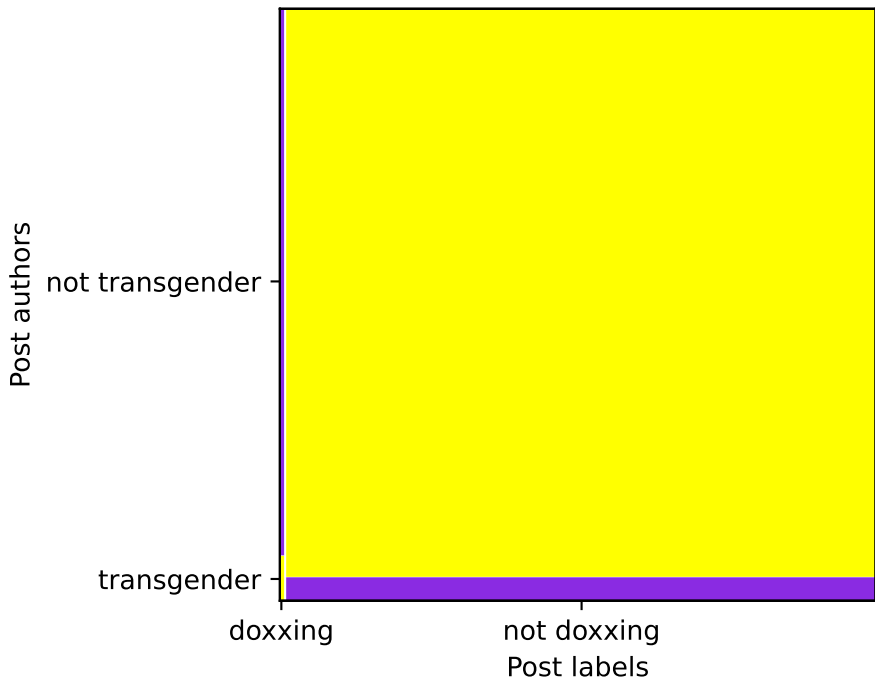

Supplement: SupplementaryMaterial [file 2025.woah-1.12.SupplementaryMaterial.zip]

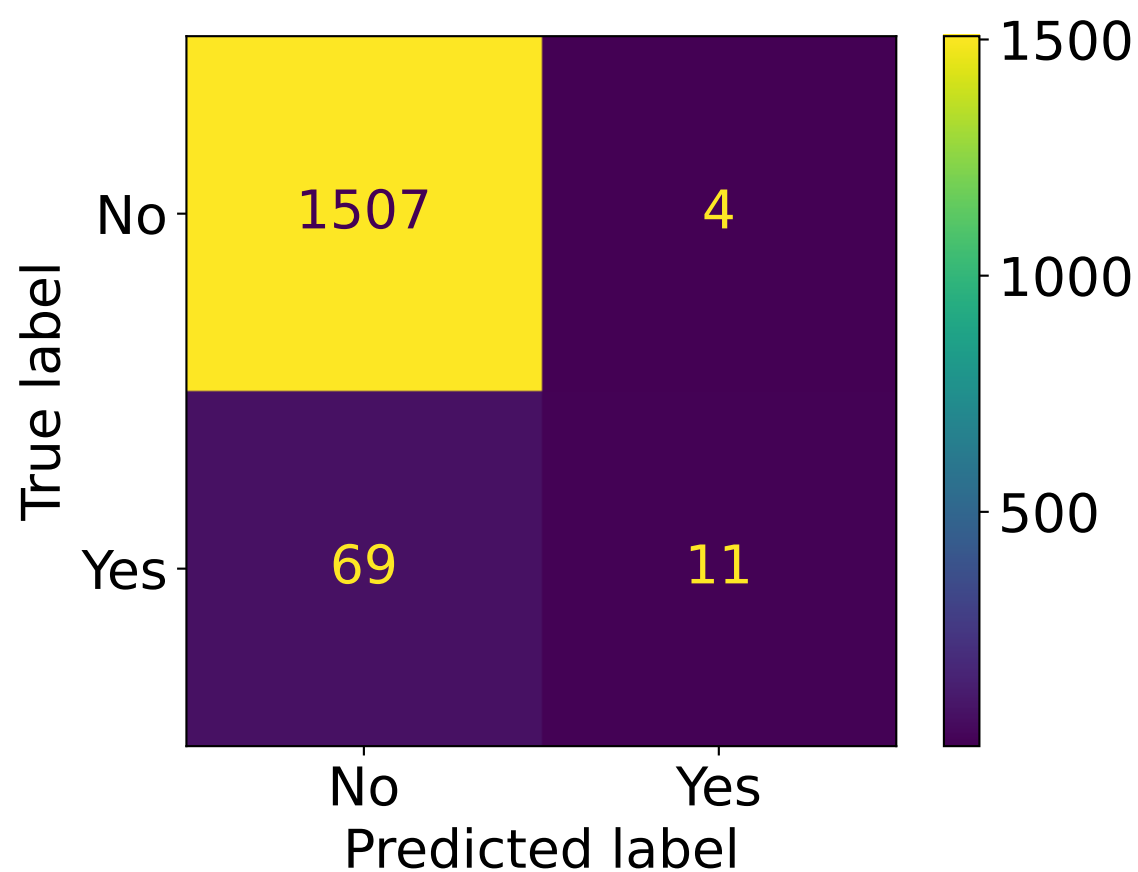

Supplement: SupplementaryMaterial [file 2025.woah-1.12.SupplementaryMaterial.zip]

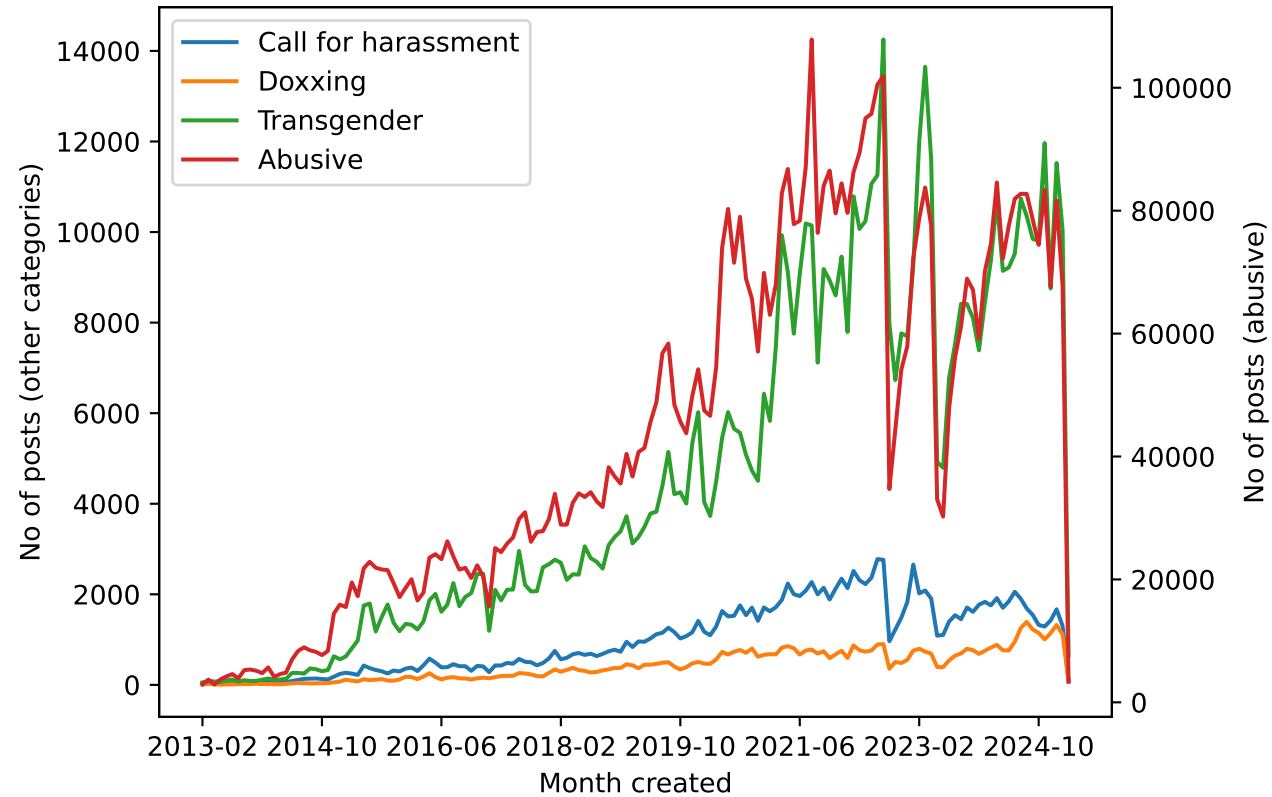

Supplement: SupplementaryMaterial [file 2025.woah-1.12.SupplementaryMaterial.zip]

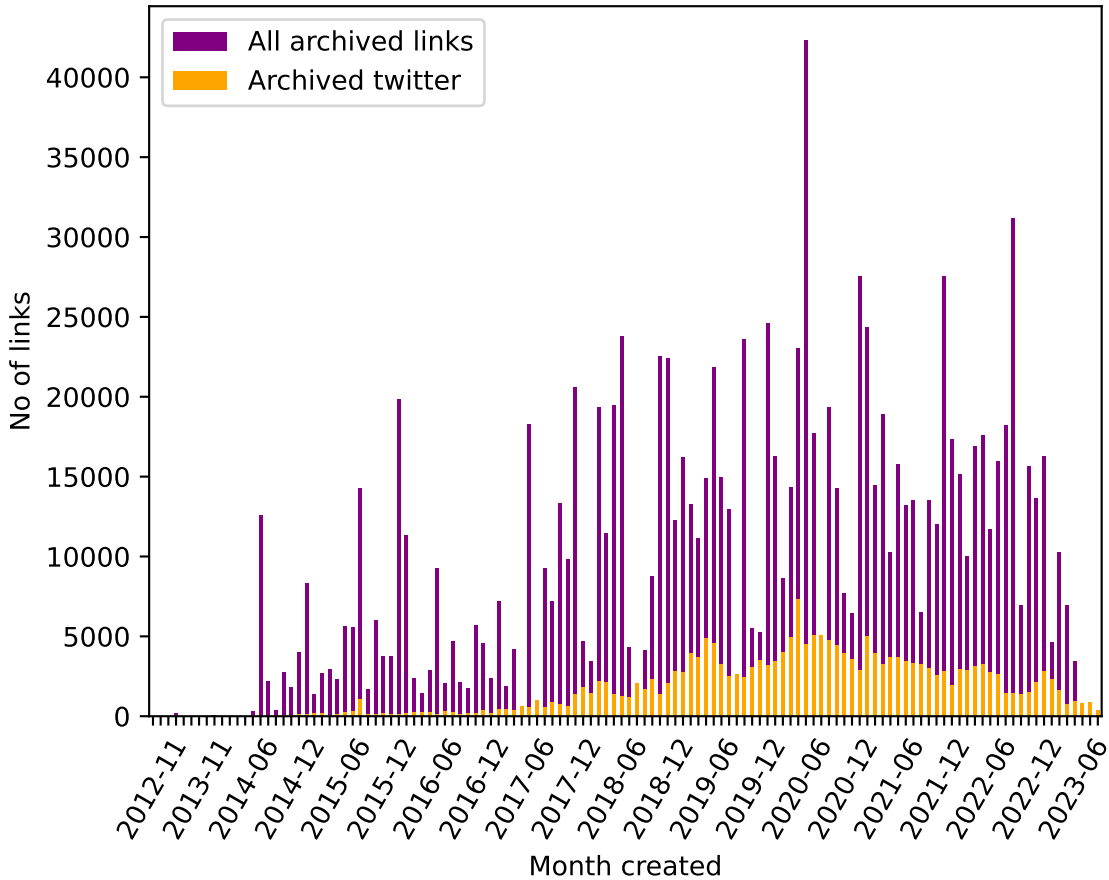

Supplement: SupplementaryMaterial [file 2025.woah-1.12.SupplementaryMaterial.zip]

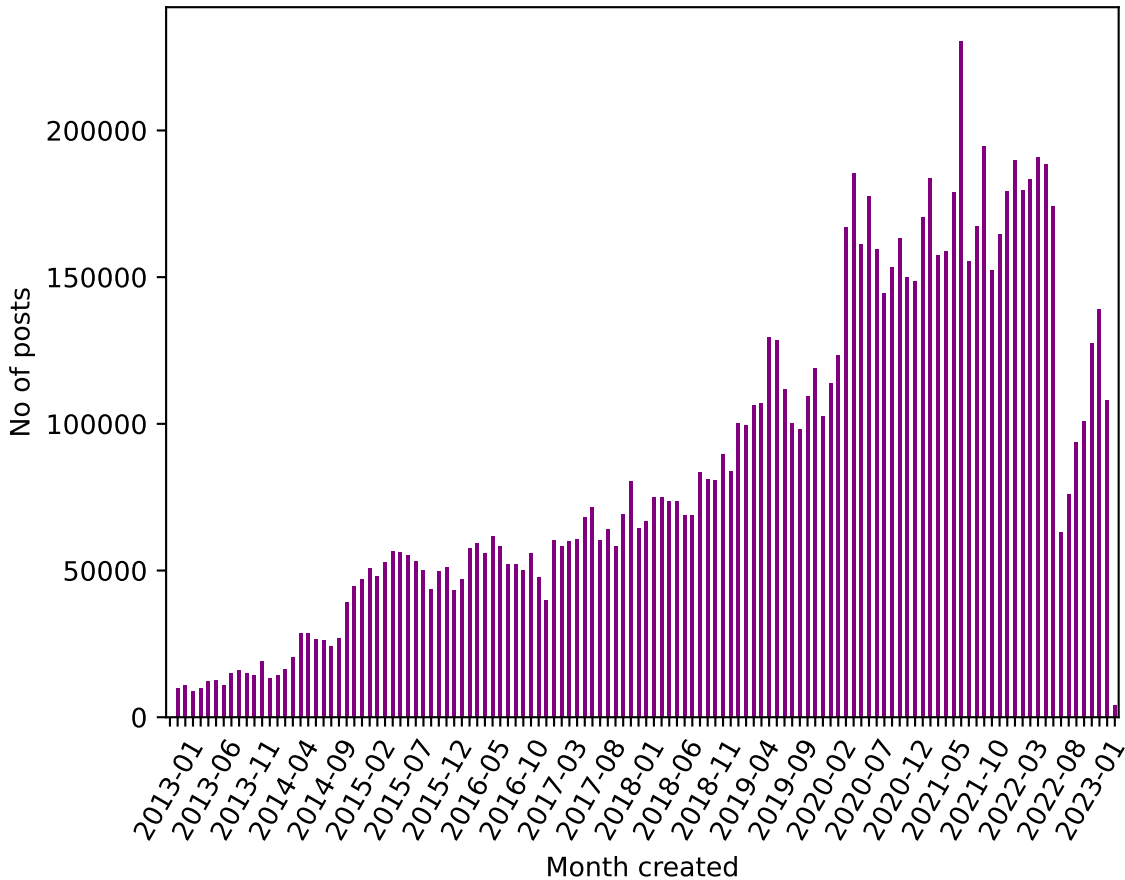

Supplement: SupplementaryMaterial [file 2025.woah-1.12.SupplementaryMaterial.zip]

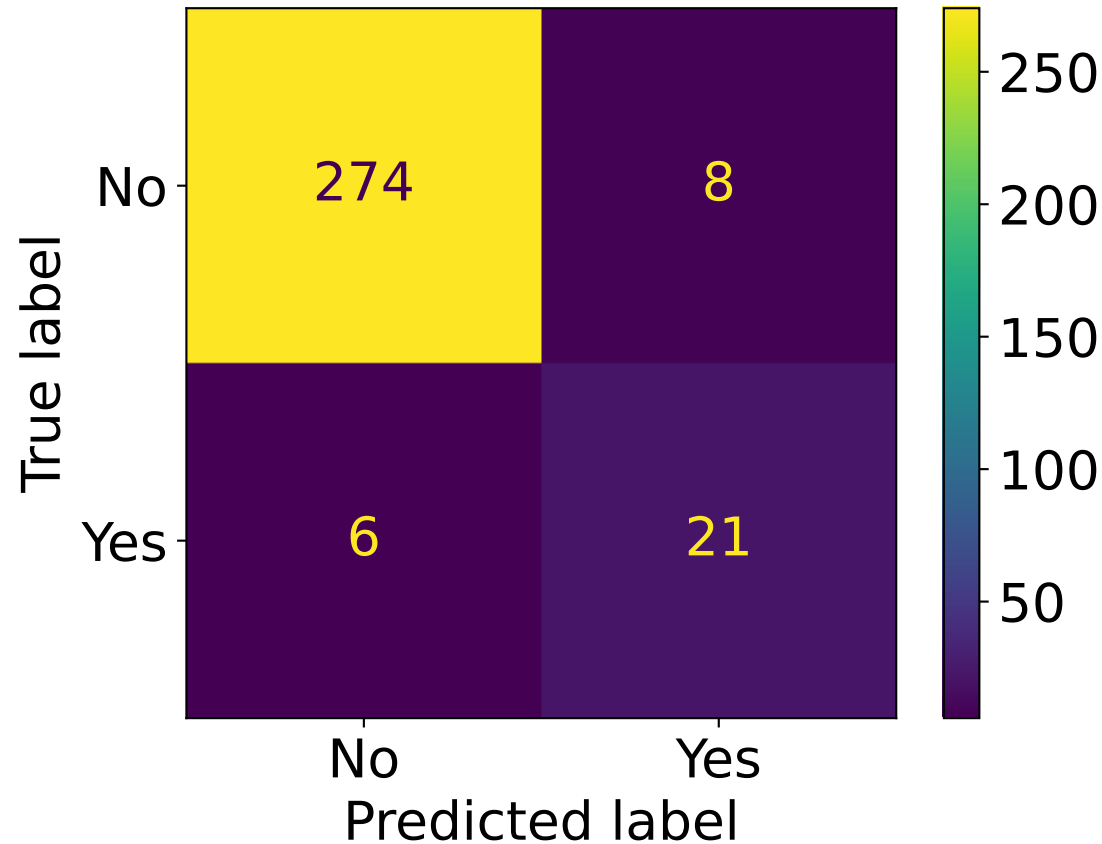

Supplement: SupplementaryMaterial [file 2025.woah-1.12.SupplementaryMaterial.zip]

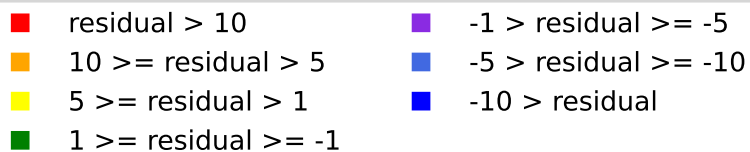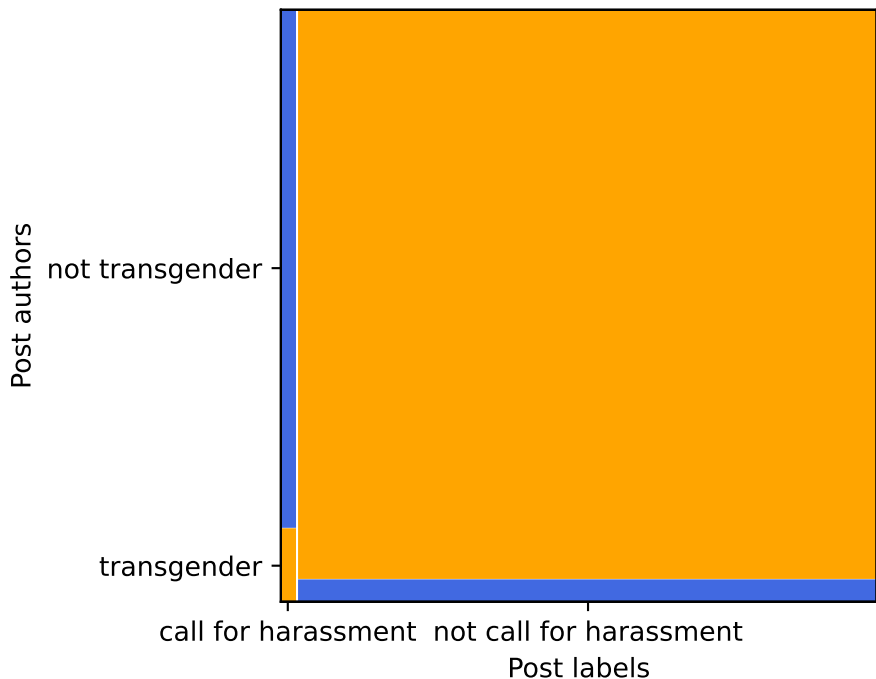

Supplement: SupplementaryMaterial [file 2025.woah-1.12.SupplementaryMaterial.zip]
